# Supplementary material for: A Novel Missense Mutation in TNNI3K Causes Recessively Inherited Cardiac Conduction Disease in a Consanguineous Pakistani Family
Source: MDPI journal article supplement (doi:10.3390/genes12081282), 2021-08-21
Supplement: s1 [file s1]

**Supplementary Materials:** Supporting information consists of four figures and four tables.

**Table S1. Primer sequence, related to Sanger validation.**

| Name        | Forward sequence     | Reverse sequence     |
|-------------|----------------------|----------------------|
| TNNI3K-Ex16 | ATCCAGGTGGAATTGTGACC | AGGTGAAGGCTCATCCAATG |

## Exome Sequencing

Variant filtering was performed with the VARBANK graphical user interface (<https://varbank.ccg.uni-koeln.de>). Applying the standard filter criteria for rare and homozygous variant as discussed in the material and method section of this manuscript, 81 different variants (15 CNVs, 47 SNVs and 19 indels) were filtered at the first step.. Next filtration was performed based on complete penetrance; variants that were heterozygous in both parents and homozygous in affected individuals. To further narrow the search for disease causing variants, coding variants and canonical splice site variants (i.e., splice site donor and splice site acceptor variants) were retained and the rest were disregarded. In the last step, disease causative variant was selected based on OMIM database, ClinVar record, dbNSFP score, CADD score, Polyphen2 score, SIFT score, and literature research.

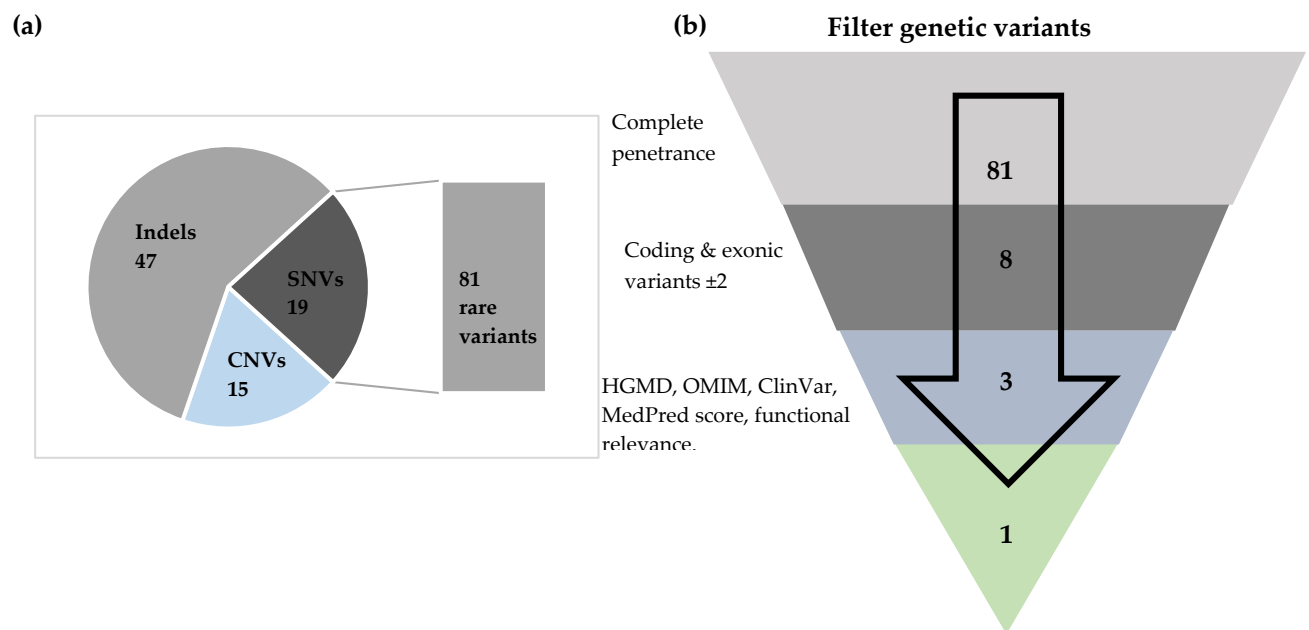

**Figure S1. (a)** Filtering and prioritizing homozygous genetic variants: **(a)** Overview of the different rare homozygous variants after assuming autosomal recessive inheritance using web interface of Varbank 2. **(b)** Filtering steps to find disease causing variant.

**Table S2. List of homozygous rare variants segregated with the observed phenotype.**

| Chr | Start     | End       | Biotype        | Type       | EnsGene         | ENsRNA             | RefSeq         | Gene          | Consequences | cDNA position c. | Protein position p. | Gnom AD Freq | dbSNP annotation | Med-Pred |
|-----|-----------|-----------|----------------|------------|-----------------|--------------------|----------------|---------------|--------------|------------------|---------------------|--------------|------------------|----------|
| 1   | 74369449  | 74369449  | antisense_RNA  | SNV        | ENSG00000237324 | ENST00000415549    | na             | na            | intragenic   | n.108-330A>G     | na                  | na           | na               | na       |
| 1   | 74369449  | 74369449  | protein_coding | SNV        | ENSG00000259030 | ENST00000370899    | NM_015978.2    | <i>TNNI3K</i> | Missense     | c.1988A>T        | p. Asp663Val        | na           | na               | 0.79     |
| 1   | 83890325  | 83890325  | protein_coding | SNV        | ENSG00000137941 | ENST00000260505    | NM_024686.4,   | <i>TTLL7</i>  | Missense     | c.2365T>G        | p. Ser789Ala        | 0.0000994    | rs778124501      | 0.55     |
| 1   | 92004622  | 92004622  | protein_coding | SNV        | ENSG00000137948 | ENST00000402388.1  | NM_001726.4    | <i>BRDT</i>   | Splice       | c.2594+3C>T      | na                  | na           | na               | na       |
| 9   | 92611269  | 92611554  | protein_coding | CNV        | ENSG00000188312 | ENST00000375579    | NM_001286971.1 | <i>CENPP</i>  | LOF          | na               | na                  | na           | na               | na       |
| 7   | 116700039 | 116700039 | protein_coding | SNV        | ENSG00000105976 | ENST00000318493.11 | NM_001127500.2 | <i>MET</i>    | Missense     | c.955G>T         | p. Ala319Ser        | 0.0000650    | rs545332056      | 0.73     |
| 7   | 120994103 | 120994103 | protein_coding | Intragenic | ENSG00000106034 | ENST00000310396    | NM_024913.4    | <i>CPED1</i>  | Intragenic   | c.249+4233G>C    | na                  | na           | na               | na       |
| 7   | 130385374 | 130385374 | protein_coding | SNV        | ENSG00000091704 | ENST00000011292    | NM_001868.3    | <i>CPA1</i>   | splice       | c.987+29G>A      | na                  | 0.000208     | rs534148807      | na       |

These variants are segregating with the phenotype in the family. Chr, chromosome; start and end are the variant genomic position; Biotype, transcript biotype; EnsGene, ENSEMBL gene id; EnsRNA, ENSEMBL transcript id; RefSeq, RefSeq id provided by NCBI; na, not available; SNV, single nucleotide variant; CNV, copy number variation; intragenic, an intragenic variation without functional annotation; LOF, loss of function. MedPred scores were taken from the dbNSFP/dbSCSNV v3.4 databases. Filtering is based on the normalized rank scores, which range from 0=benign to 1=pathogenic.

Table S3. List of primary homozygous candidate variants in runs of homozygosity (ROH) regions.

| Chr: region<br>(build<br>GRCh38/hg38) | Gene          | RefSeq      | Mut cDNA<br>(Mut Prot)     | Consanguin-<br>ity/Zygosity | gnomAD<br>Freq | dbSNP<br>annotation | Med<br>Pred | CADD<br>PHRED<br>V1.3 | GERP++<br>RS | Poly-<br>phene2 | SIFT  | ACMG<br>interpretation                     | RVIS_<br>percentile | disease association (OMIM<br>number, mode of<br>inheritance)                                                                                                                                                                                                                                       |
|---------------------------------------|---------------|-------------|----------------------------|-----------------------------|----------------|---------------------|-------------|-----------------------|--------------|-----------------|-------|--------------------------------------------|---------------------|----------------------------------------------------------------------------------------------------------------------------------------------------------------------------------------------------------------------------------------------------------------------------------------------------|
| 1: 74369449                           | <i>TNNI3K</i> | NM_015978.2 | c.1531T>C<br>(p.Ser511Pro) | homozygous                  | na             | na                  | 0.79        | 26.8                  | 5.27         | 1.0             | 0.009 | Pathogenic<br>(PS4, PM2,<br>PP3, PPI, PP4) | 29.5                | Cardiac conduction disease<br>with or without dilated<br>cardiomyopathy (MIM<br>616117, AD)                                                                                                                                                                                                        |
| 7:116700039                           | <i>MET</i>    | NM_000245.4 | c.955G>T<br>(p.Ala319Ser)  | homzygous                   | 0.0000650      | rs545332056         | 0.73        | 25.9                  | 6.04         | 1.0             | 0.0   | VUS<br>(BP5,BS2)                           | 23.7                | i) Deafness, autosomal<br>recessive 97 (MIM 616705,<br>AR)<br>ii) Osteofibrous dysplasia,<br>susceptibility to (MIM<br>607278, AD)<br>iii) Hepatocellular<br>carcinoma, childhood type,<br>somatic (MIM 114550)<br>iv) Renal cell carcinoma,<br>papillary, 1, familial and<br>somatic (MIM 605074) |
| 1: 83890325                           | <i>TTLL7</i>  | NM_024686.4 | c.2365T>G<br>(p.Ser789Ala) | homzygous                   | 0.0000994      | rs778124501         | 0.55        | 23.8                  | 5.12         | 0.8             | 0.007 | Likely benign<br>(BS2)                     | 13.5                | No association [1]                                                                                                                                                                                                                                                                                 |

These filtered variants are located within the regions of homozygosity which are derived from exome sequence data. MedPred, CADD, GERP++\_RS scores, Polyphen2, SIFT show the *in-silico* pathogenicity prediction of the variant. Variants were graded using the American College of Medical Genetics and Genomics (ACMG) classification system [2]. Abbreviation used; AR, autosomal recessive; AD, autosomal dominant; VUS, variant of uncertain significance; ACMG, American College of Medical Genetics and Genomics. The variant nomenclature was verified according to the Human Genome Variation Society (HGVS) standards using tool 'www.mutalyzer.nl'.

**Ser511Pro**

↓

```

Homo sapiens      481 RCRNKIVAIAIKRYRANTYCSKSDVDMFCREVSIILCQLNHPCVVIQFVGACLNNDPSQFAIVTQ 540
Pan troglodytes   481 RCRNKIVAIAIKRYRANTYCSKSDVDMFCREVSIILCQLNHPCVVIQFVGACLNNDPSQFAIVTQ 540
Macaca mulatta    481 RCRNKIVAIAIKRYRANTYCSKSDVDMFCREVSIILCQLNHPCVVIQFVGACLNNDPSQFAIVTQ 540
Bos tauruss       481 RCRNKIVAIAIKRYRANTYCSKSDVDMFCREVSIILCRLNHPCIIQFVGACLNNDPSQFAIVTQ 540
Mus musculus      481 RCRNKIVAIAIKRYRANTYCSKSDVDMFCREVSIILCQLNHPCVVQFVGACLDLDDPSQFAIVTQ 540
Ratus norvegicus  481 RCRNKIVAIAIKRYRANTYCSKSDVDMFCREVSIILCQLNHPCVVQFVGACLDLDDPSQFAIVTQ 540
Canus lupus familia 481 RCRNKIVAIAIKRYRANTYCSKSDVDMFCREVSIILCRLNHPCIIQFVGACLNNDPSQFAIVTQ 540
Gallus gallus     481 RCRNKIVAIAIKRYRANTYCSKSDVDMFCREVSIILCRLNHPCVVIQFVGACLDLDDPSQFAIVTQ 540
Xenopus tropicalis 481 RCRNKIVAIAIKRYRANTYCSKSDVDMFCREVSIILCRLNHPCVVIQFVGACLDLDDPSQFAIVTQ 540
Danio rerio       481 KCRNKIVAIAIKRYPNTYCSKSDTDMFCREVSIILCRLNHPCVVIQFVGACLDLDDPSQFAIVTQ 540

```

:\*\*\*\*\* \*\*\*\*\*.\*\*\*\*\*:\*\*\*\*\*:\*\*\*\*\*:\*\*\*\*\*

**Figure S2:** Conservation of TNNI3K-Ser511Pro mutation. Conservation analysis of the amino acid sequences between different species. The analysis was conducted using clustal omega. The mutation site and its neighboring sequences were well conserved among the different species. \* Indicates identical amino acids indicates nonidentical residues. Numbers represent amino acid position.

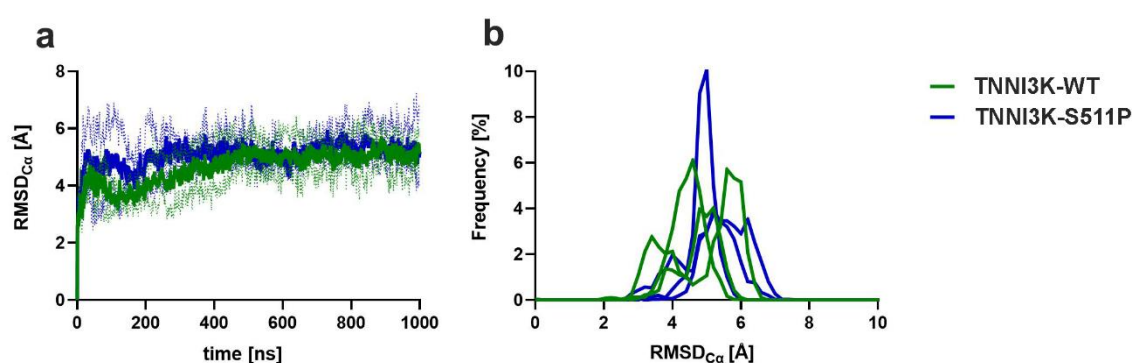

**Figure S3:** Structural fluctuation of TNNI3K-WT (green) and TNNI3K-Ser511Pro (blue) during three independent 1  $\mu$ s MD simulations. Alignments and measurements were performed for the C $\alpha$  carbon atoms. **(a)** Root mean square deviation (RMSD) plot, shown with respect to the initial minimized structures as mean values with error bars indicated by dots. **(b)** Distribution of RMSD.

**Table S4.** The geographical distribution of TNNI3K pathogenic variants.

AD, autosomal dominant; AR, autosomal recessive; rs, a reference SNP ID number; hyphen, no information

| No | TNNI3K variant            | rsID         | Type of mutation | Mode of inheritance | Family origin | Broad clinical phenotypes                                                 | Reference                |
|----|---------------------------|--------------|------------------|---------------------|---------------|---------------------------------------------------------------------------|--------------------------|
| 1  | c.1577G>A,<br>p.Gly526Asp | rs606231469  | Missense         | AD                  | German        | Conduction system disease, atrial tachyarrhythmia, dilated cardiomyopathy | Theis et al., (2014) [3] |
| 2  | c.1615A>G,<br>p.Thr539Ala | rs1163083033 | Missense         | AD                  | Canada        | Conduction system disease, congenital junctional ectopic tachycardia      | Xi et al., (2015) [4]    |

|   |                           |             |           |    |                        |                                                                                |                                    |
|---|---------------------------|-------------|-----------|----|------------------------|--------------------------------------------------------------------------------|------------------------------------|
| 3 | c.333+2T>C,<br>p.?        | -           | Splicing  | AD | China                  | Conduction<br>system disease,<br>dilated<br>cardiomyopathy                     | Fan et al.,<br>(2018)<br>[5]       |
| 4 | c.2302G>A,<br>p.Gly768Leu | rs202238194 | Missense  | AD | Caucasian,<br>Salvador | Supraventricula<br>r tachycardia,<br>cardiomyopathy<br>, conduction<br>disease | Podliesna et<br>al., (2019)<br>[6] |
| 5 | c.1441C>T,<br>p. Arg481*  | rs757261707 | Non-sense | AD | China                  | Cardiac<br>conduction<br>disease                                               | Liu et al., 2020<br>[7]            |
| 6 | c.1531T>C,<br>p.Ser511Pro | -           | Missense  | AR | Pakistan               | Cardiac<br>conduction<br>disease                                               | This study                         |

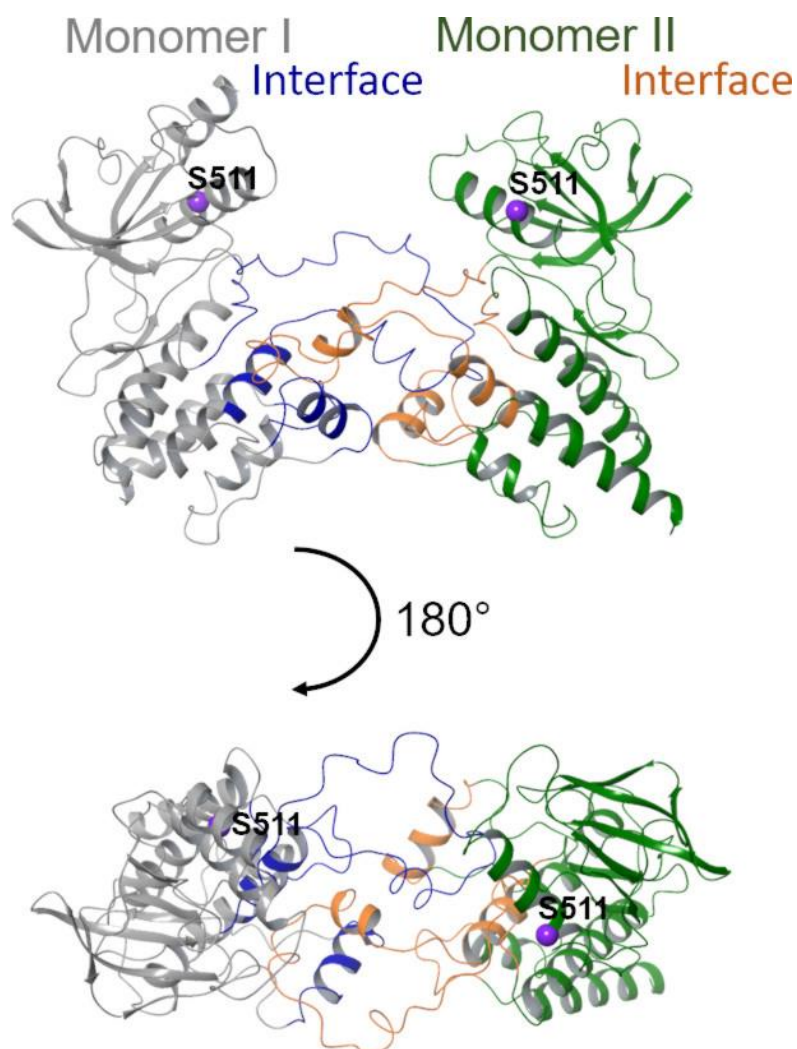

**Figure S4:** Dimer interface region of TNNT3K-WT (PDB-ID: 4YF3 [8]). Monomer I is represented as a gray ribbon with the amino acids of the dimer interface in blue and monomer II as a green ribbon with the amino acids of the dimer interface in orange. The C $\alpha$ .atoms of Ser511 in monomers I and II are shown as violet spheres.

The URLs for data presented herein are as follows

- KiNET, <http://www.kinexus.ca/kinet>
- Mutalyzer, <http://www.mutalyzer.nl/>
- ENSEMBL, <http://www.ensembl.org>
- Online Mendelian Inheritance in Man (OMIM), [www.omim.org](http://www.omim.org)
- Primer3, v.0.4.0, <http://frodo.wi.mit.edu/primer3/input.htm>
- SIFT (Sorting Intolerant from Tolerant), <http://sift.jcvi.org/>
- Picard, <http://broadinstitute.github.io/picard/>
- 1000 Genomes, <http://browser.1000genomes.org>
- dbSNP, <http://www.ncbi.nlm.nih.gov/snp>
- dbVar, <http://www.ncbi.nlm.nih.gov/dbvar>
- ClinVar, <http://www.ncbi.nlm.nih.gov/clinvar>
- OMIM, <http://www.omim.org>
- Human Gene Mutation Database, <http://www.hgmd.org>
- Varbank Variant Analysis Platform, <https://varbank.ccg.uni-koeln.de/varbank2/>

### Supplementary References

1. Ikegami, K.; Mukai, M.; Tsuchida, J.; Heier, R.L.; Macgregor, G.R.; Setou, M. TTLL7 is a mammalian beta-tubulin polyglutamylase required for growth of MAP2-positive neurites. *J Biol Chem* **2006**, *281*, 30707-30716, doi:10.1074/jbc.M603984200.
2. Richards, S.; Aziz, N.; Bale, S.; Bick, D.; Das, S.; Gastier-Foster, J.; Grody, W.W.; Hegde, M.; Lyon, E.; Spector, E.; et al. Standards and guidelines for the interpretation of sequence variants: a joint consensus recommendation of the American College of Medical Genetics and Genomics and the Association for Molecular Pathology. *Genet Med* **2015**, *17*, 405-423, doi:10.1038/gim.2015.30.
3. Theis, J.L.; Zimmermann, M.T.; Larsen, B.T.; Rybakova, I.N.; Long, P.A.; Evans, J.M.; Middha, S.; de Andrade, M.; Moss, R.L.; Wieben, E.D.; et al. TNNI3K mutation in familial syndrome of conduction system disease, atrial tachyarrhythmia and dilated cardiomyopathy. *Hum Mol Genet* **2014**, *23*, 5793-5804, doi:10.1093/hmg/ddu297.
4. Xi, Y.; Honeywell, C.; Zhang, D.; Schwartzentruber, J.; Beaulieu, C.L.; Tetreault, M.; Hartley, T.; Marton, J.; Vidal, S.M.; Majewski, J.; et al. Whole exome sequencing identifies the TNNI3K gene as a cause of familial conduction system disease and congenital junctional ectopic tachycardia. *Int J Cardiol* **2015**, *185*, 114-116, doi:10.1016/j.ijcard.2015.03.130.

5. Fan, L.-L.; Huang, H.; Jin, J.-Y.; Li, J.-J.; Chen, Y.-Q.; Zhao, S.-P.; Xiang, R. Whole exome sequencing identifies a novel mutation (c. 333+2T>C) of TNNI3K in a Chinese family with dilated cardiomyopathy and cardiac conduction disease. *Gene* **2018**, *648*, 63-67, doi:10.1016/j.gene.2018.01.055.
6. Podliesna, S.; Delanne, J.; Miller, L.; Tester, D.J.; Uzunyan, M.; Yano, S.; Klerk, M.; Cannon, B.C.; Khongphatthanayothin, A.; Laurent, G.; et al. Supraventricular tachycardias, conduction disease, and cardiomyopathy in 3 families with the same rare variant in TNNI3K (p.Glu768Lys). *Heart Rhythm* **2019**, *16*, 98-105, doi:10.1016/j.hrthm.2018.07.015.
7. Liu, J.; Liu, D.; Li, M.; Wu, K.; Liu, N.; Zhao, C.; Shi, X.; Liu, Q. Identification of a nonsense mutation in TNNI3K associated with cardiac conduction disease. *J Clin Lab Anal* **2020**, *34*, e23418, doi:10.1002/jcla.23418
8. Lawhorn, B.G.; Philp, J.; Zhao, Y.; Louer, C.; Hammond, M.; Cheung, M.; Fries, H.; Graves, A.P.; Shewchuk, L.; Wang, L. Identification of purines and 7-deazapurines as potent and selective type I inhibitors of troponin I-interacting kinase (TNNI3K). *J Med Chem* **2015**, *58*, 7431-7448, doi:10.1021/acs.jmedchem.5b00931.
